# Supplementary material for: Export of malaria proteins requires co-translational processing of the PEXEL motif independent of phosphatidylinositol-3-phosphate binding
Source: Nat Commun. 2016 Feb 1;7:10470. doi: 10.1038/ncomms10470 (PMC4740378; doi:10.1038/ncomms10470)
Supplement: Supplementary Information — Supplementary Figures 1-11 and Supplementary Tables 1-2 and Supplementary References [file ncomms10470-s1.pdf]

## Supplementary information

### Supplementary Figures

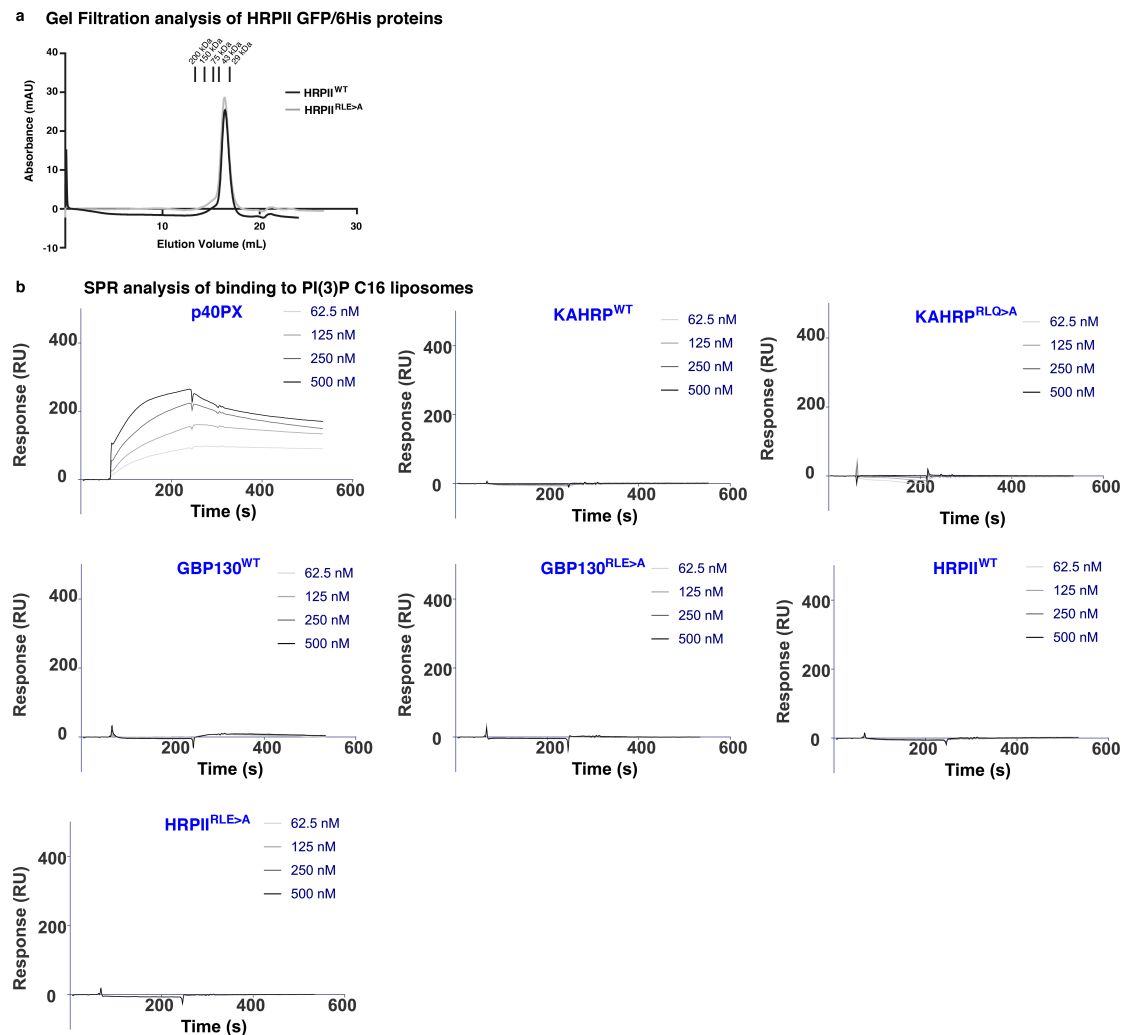

### Supplementary Figure 1.

**Recombinant PEXEL proteins do not bind PI(3)P.** (a) Gel filtration analysis of HRPII<sup>WT</sup> and HRPII<sup>RLE>A</sup> proteins shows the proteins are monomeric. (b) Surface plasmon resonance (SPR) analysis of recombinant protein binding to a PI(3)P liposome-coated chip. Binding to PC/PE control liposomes was subtracted to give the presented sensorgrams as performed in <sup>1</sup>. Recombinant p40PX (PI(3)P Grip from Echelon Biosciences) bound the liposomes (K<sub>d</sub> 196  $\mu$ M). KAHRP, GBP130 and HRPII proteins with a native PEXEL (WT) do not bind PI(3)P liposomes more than proteins possessing the corresponding mutant PEXEL (RLQ>A and RLE>A, respectively). Experiments were performed in triplicate.

a

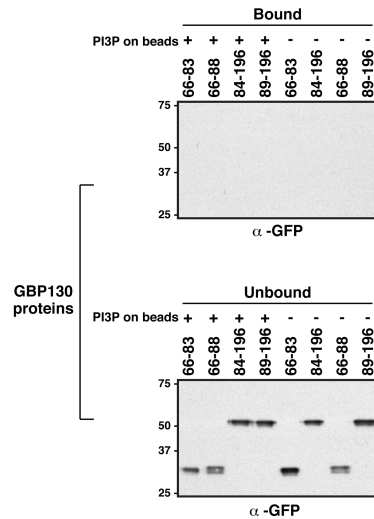

b

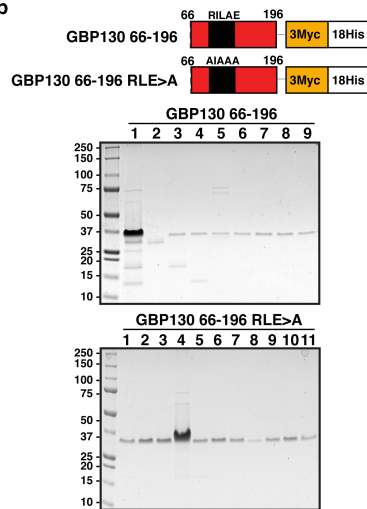

c

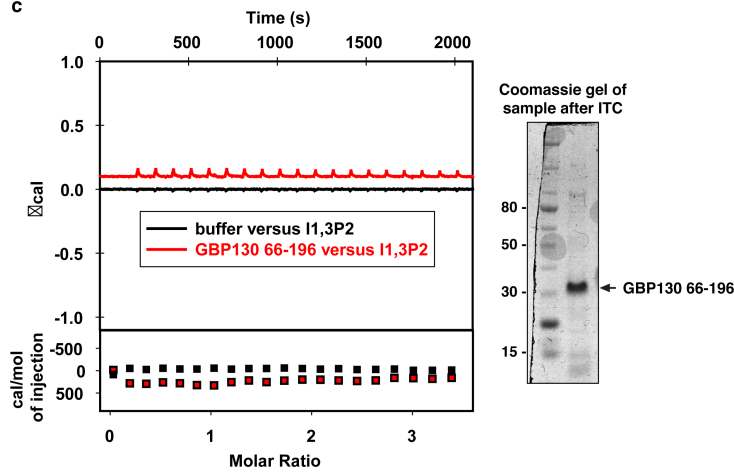

d

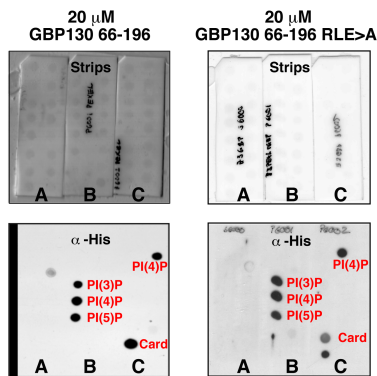

e

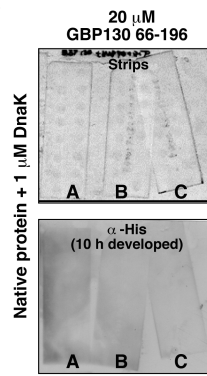

f

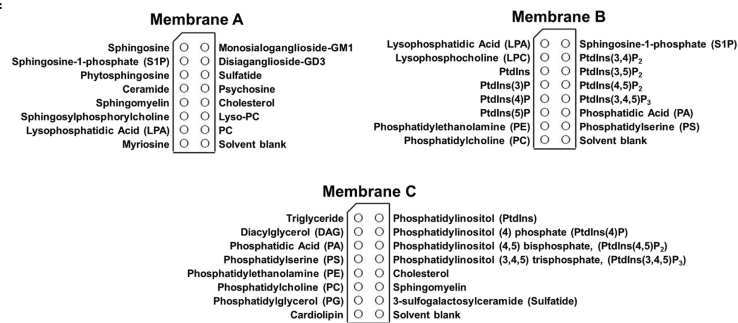

**Supplementary Figure 2. Assessment of PI(3)P binding by GBP130 proteins. (a)** Immunoblot with anti-GFP antibodies shows that recombinant GBP130 protein fragments 66-83, 66-88, 84-196 and 89-196 (see Figure 1a) do not bind to PI(3)P-coated beads (+) or control beads (-) that were eluted with SDS-PAGE sample buffer. 10% of the unbound fraction volume was probed by immunoblot to visualize the proteins. The experiment was conducted at the same time as Figure 1d, where p40PX bound the PI(3)P-coated beads. Experiments were performed in triplicate. **(b)** Schematic of recombinant GBP130 66-196 proteins generated previously <sup>2</sup>. Residues 66-196 of GBP130, containing the PEXEL motif, or the PEXEL mutation RLE>A, were fused to 3cMyc epitopes and 18His residues. Coomassie blue-stained gels showing serial elutions of GBP130 proteins following expression in *E. coli* and absorptive chromatography. The last four fractions of each were used in subsequent experiments. **(c)** Isothermal calorimetry (ITC) of GBP130 66-196 (85  $\mu$ M) in solution with the head group of PI(3)P, inositol 1,3 biphosphate (I1,3P2), show no evidence of binding. The titration was similar between I1,3P2 (1.25 mM) into dialysis buffer (150 mM NaCl, 20 mM HEPES, pH 7.4) (negative control) and the same buffer containing GBP130 66-196. After ITC, the GBP130 66-196 protein sample was shown to be present by SDS-PAGE and Coomassie blue stain (right, arrow). **(d)** Binding of GBP130 66-196 and GBP130 66-196 RLE>A proteins (20  $\mu$ M) to PI(3)P, PI(4)P, PI(5)P (membrane B), and PI(4)P and cardiolipin (card) (membrane C) on lipid spot membranes. Binding of both proteins shows it is not PEXEL-specific. **(e)** Binding of GBP130 66-196 (20  $\mu$ M) to lipid spot membranes is blocked by 1  $\mu$ M of the *E. coli* chaperone DnaK, which represents 5% of the total GBP130 amount added. Membranes were developed for 10 hours. **(f)** The identity of the lipids in each spot on membranes A, B and C are shown.

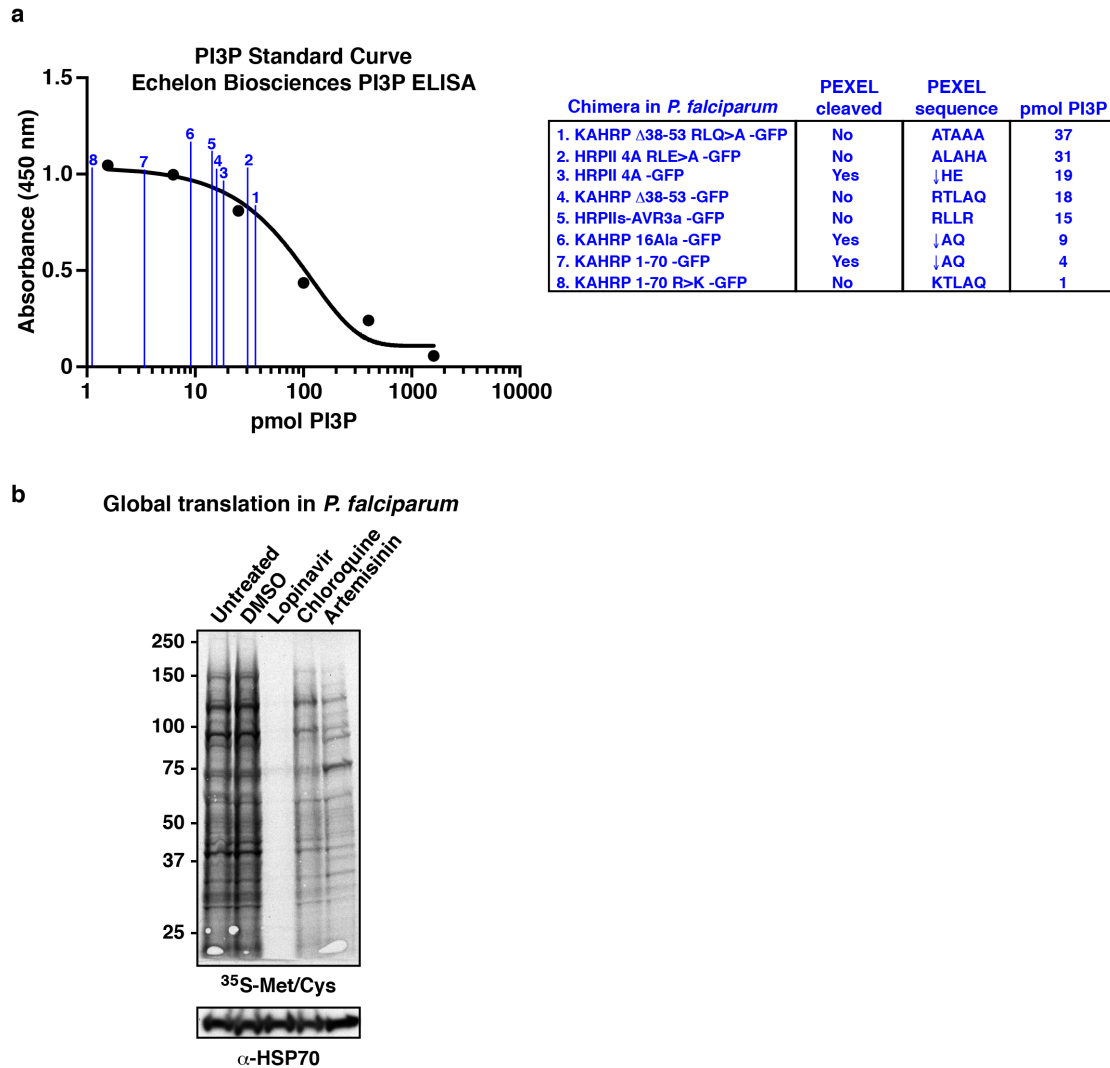

**Supplementary Figure 3. PEXEL and RxLR chimeras do not bind PI(3)P in *P. falciparum*.** (a) Standard curve generated using the PI(3)P standards provided in the Echelon Biosciences PI(3)P Mass ELISA kit. Blue lines indicate the pmol of PI(3)P bound to each chimera immunoprecipitated from *P. falciparum* and the deduced concentrations are listed in the Table in descending order (right). Bound PI(3)P was determined by measuring the optical density at 450 nm in biological duplicates. Data shown is one of two repeated experiments showing similar results. Whether the PEXEL in each chimera is cleaved by plasmepsin V, and the remaining PEXEL sequence thereafter, is indicated in the table. (b). Assessment of global protein synthesis in *P. falciparum*-infected erythrocytes following treatment with DMSO, lopinavir (50  $\mu$ M), chloroquine (150 ng/ml) or artemisinin (100 ng/ml) for 7 hr prior to addition of radio-labelled amino acids to the culture medium for 15 min. DMSO had no effect compared to the untreated control; however, lopinavir treatment almost completely blocked translation. The positive control treatments chloroquine and artemisinin also had

negative effects on translation, likely because the parasites were dying from the 7 hr treatment. HSP70 levels were probed by immunoblot following radiolabelling.

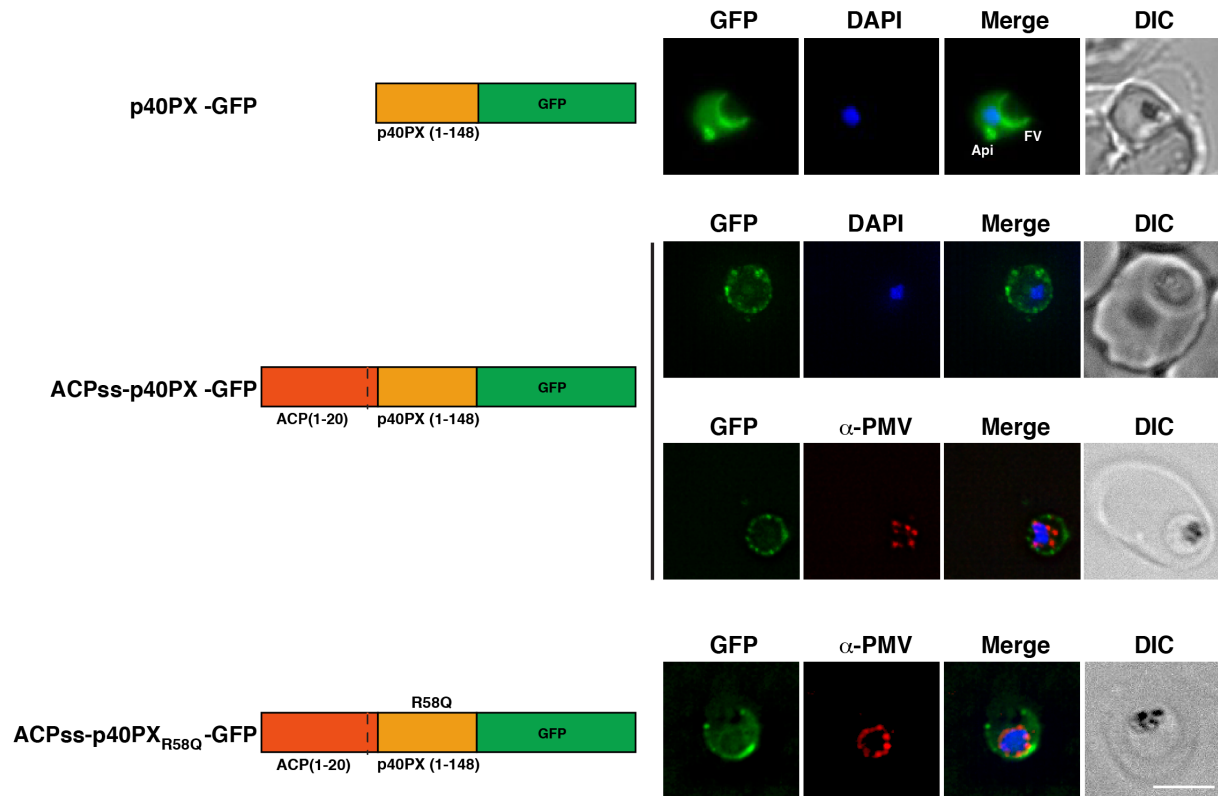

**Supplementary Figure 4. Expression of p40PX in *P. falciparum* using the ACP signal sequence.** Expression of p40PX-GFP in *P. falciparum* localizes the protein to the food vacuole membrane (FV) and apicoplast (Api). Middle: Fusion of p40PX-GFP to the signal peptide from acyl carrier protein (ACP) results in entry into the secretory pathway and localization at the parasitophorous vacuole in *P. falciparum*-infected erythrocytes. The PI(3)P reporter was not observed in the parasite ER, which was labelled with anti-PMV (plasmepsin V) antibodies. Mutation of the PI(3)P binding residue R58Q in p40PX (ACPss-p40PX<sub>R58Q</sub>-GFP) results in localization at the parasitophorous vacuole, similar to the un-mutated form, and faint ER staining. Scale bar is 5 μM.

Figure S5

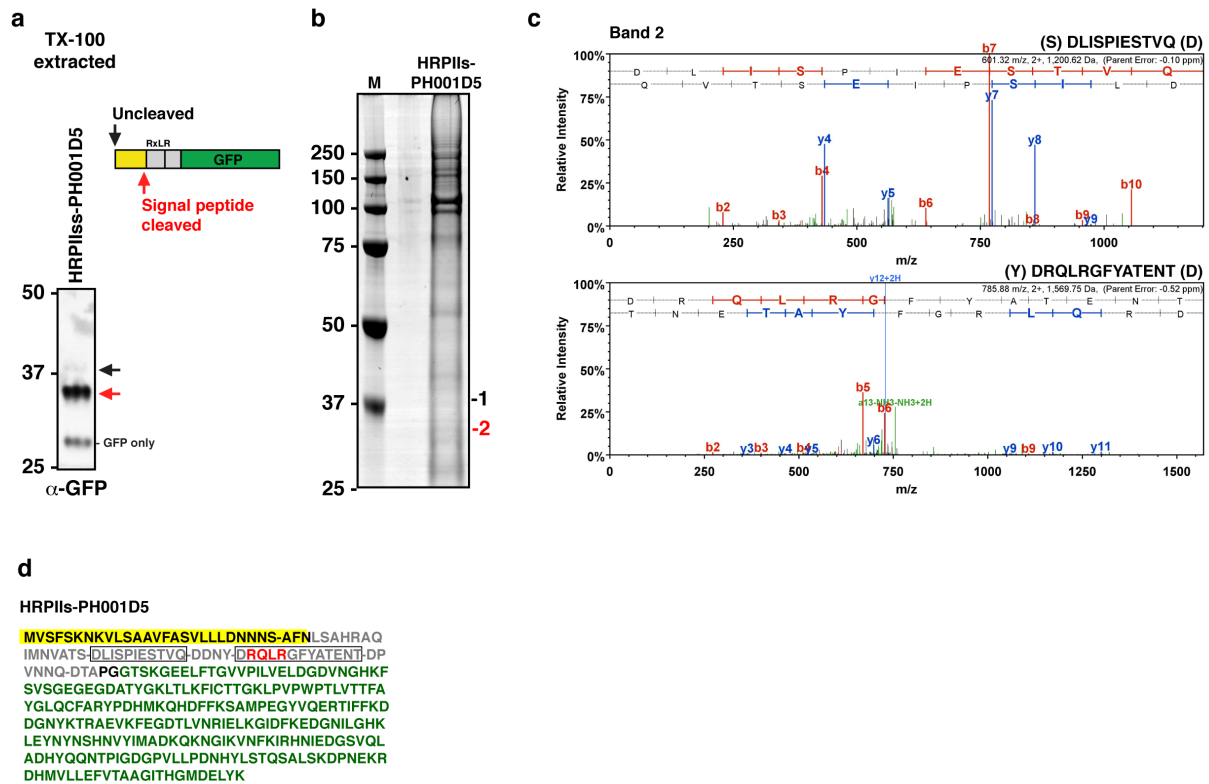

**Supplementary Figure 5. The RxLR motif is not cleaved by plasmepsin V in *P. falciparum*.** (a) Immunoblot with anti-GFP antibodies of HRPIIs-PH001D5 following affinity purification from TX-100 extracted transgenic *P. falciparum* lysates. The major species is signal peptide cleaved (32.8 kDa; red arrow), while uncleaved (35.8 kDa; black arrow) and ‘GFP only’ from the food vacuole are also present. The uncleaved species may be refractory to TX-100 extraction. (b) Coomassie blue stained gel of HRPIIs-PH001D5 proteins purified from *P. falciparum* TX-100 lysates by affinity chromatography with anti-GFP agarose. Bands 1 and 2 (labeled on right) were excised from the gel, digested with AspN (Promega) and subjected to LC-MS/MS for peptide identification. (c) Mass spectra of peptides detected from band 2 in panel (B) (the signal peptide cleaved species) that are either N-terminal to the RxLR motif (DLISPIESTVQ) but still C-terminal of the signal sequence (upper spectrum), or which contain the RxLR motif intact (DRQLRGFYATENT) showing it was not cleaved by plasmepsin V in *P. falciparum*-infected erythrocytes (lower spectrum) are shown. (d) Amino acid sequence of HRPIIs-PH001D5, showing the signal sequence (yellow) and signalP prediction (dash in the yellow region), the Oomycete effector sequence (grey) with RxLR sequence shown in red, the predicted AspN cleavage sites (dashes in the grey region) and GFP (green). The peptides detected by LC-MS/MS are boxed.

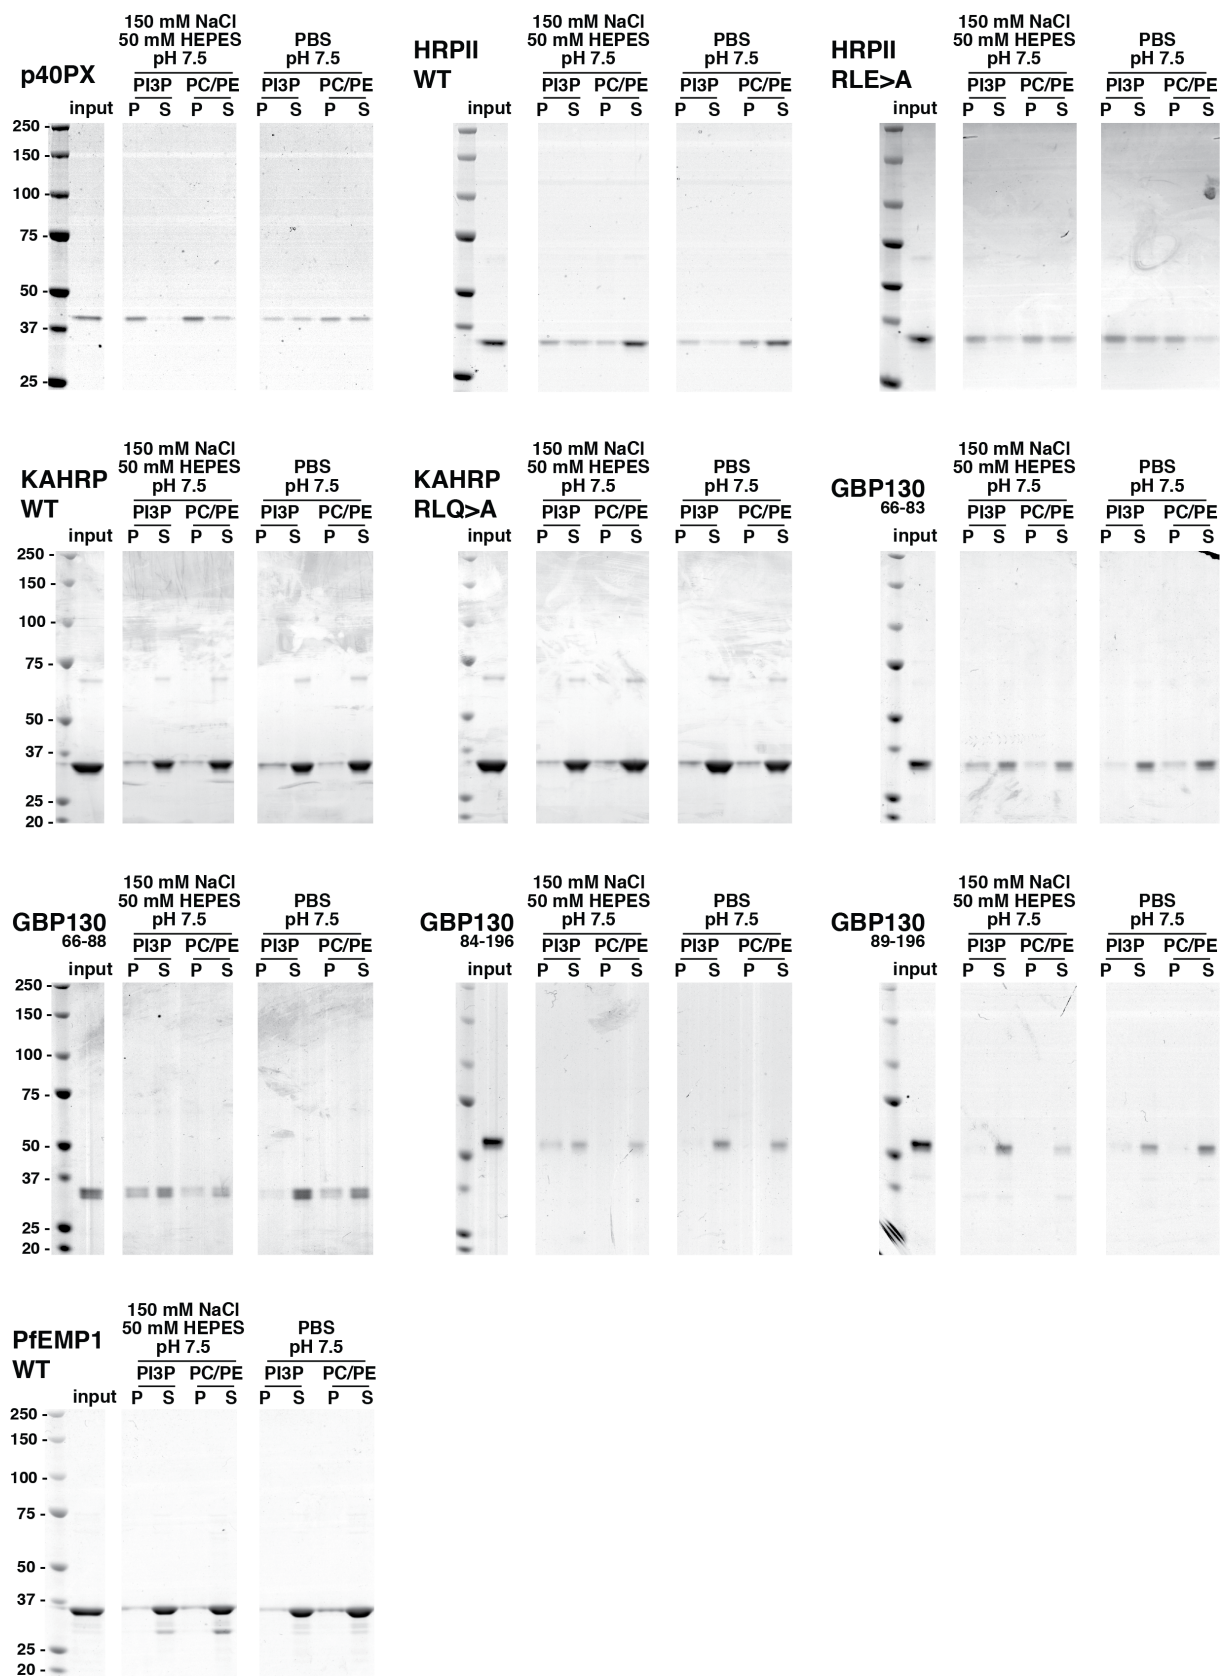

**Supplementary Figure 6. Binding of proteins to PI(3)P liposomes or control PC/PE liposomes, determined by ultracentrifugation.** Full-length gels from Fig. 1d. Pellet and

supernatant fractions were resolved by SDS-PAGE and Coomassie blue stain. Proteins were ultracentrifuged in buffer to remove potential aggregates prior to incubation with liposomes, explaining why input and sum of pellet and supernatant sometimes differ. Experiments were performed in triplicate.

e

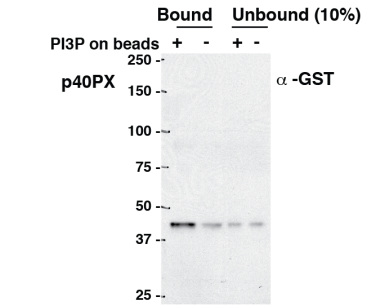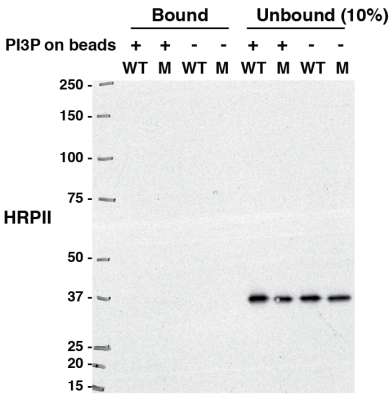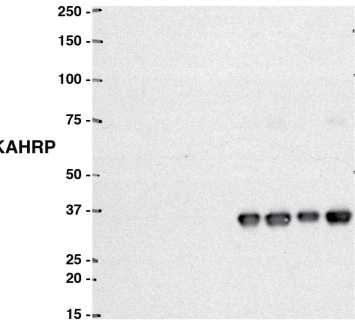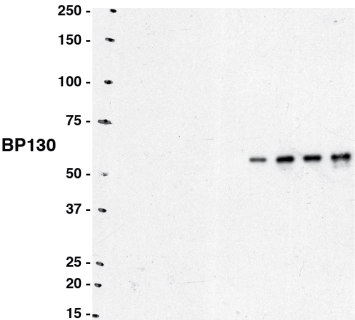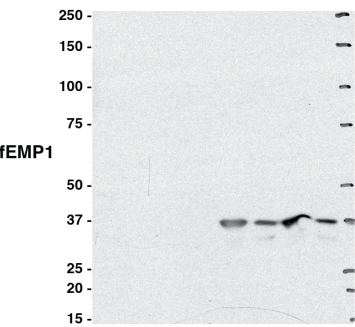

$\alpha$ -GFP

**Supplementary Figure 7. Binding of p40PX and *P. falciparum* proteins with native PEXEL (WT) or mutant PEXEL (M) to PI(3)P-coated beads (+) or control beads lacking lipid (-). Full-length blots from Fig. 1e. Bound protein was eluted in SDS-PAGE sample buffer and detected by immunoblot with anti-GST (p40PX) or anti-GFP (*P. falciparum* proteins). 10% of unbound fraction volume was loaded to visualize protein inputs. No binding was detected for *P. falciparum* exported proteins. Experiments were performed in triplicate.**

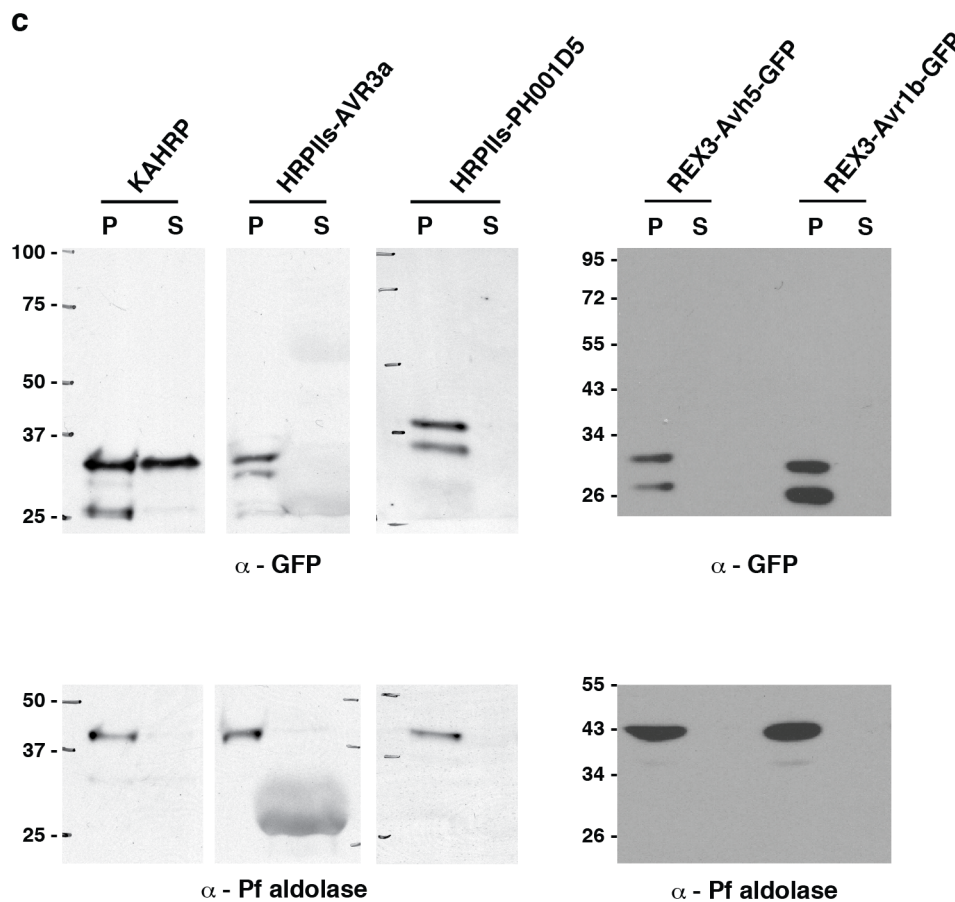

**Supplementary Figure 8. Immunoblot with anti-GFP antibodies of each chimera from the tetanolysin pellet (P) and supernatant (S) shows that KAHRP<sub>1-96</sub> is exported but RxLR chimeras are not. Full-length blots from Fig. 3c. Tetanolysin inserts pores in the erythrocyte membrane allowing sampling of the host cell cytosol. Aldolase was included as a control, as described previously.**

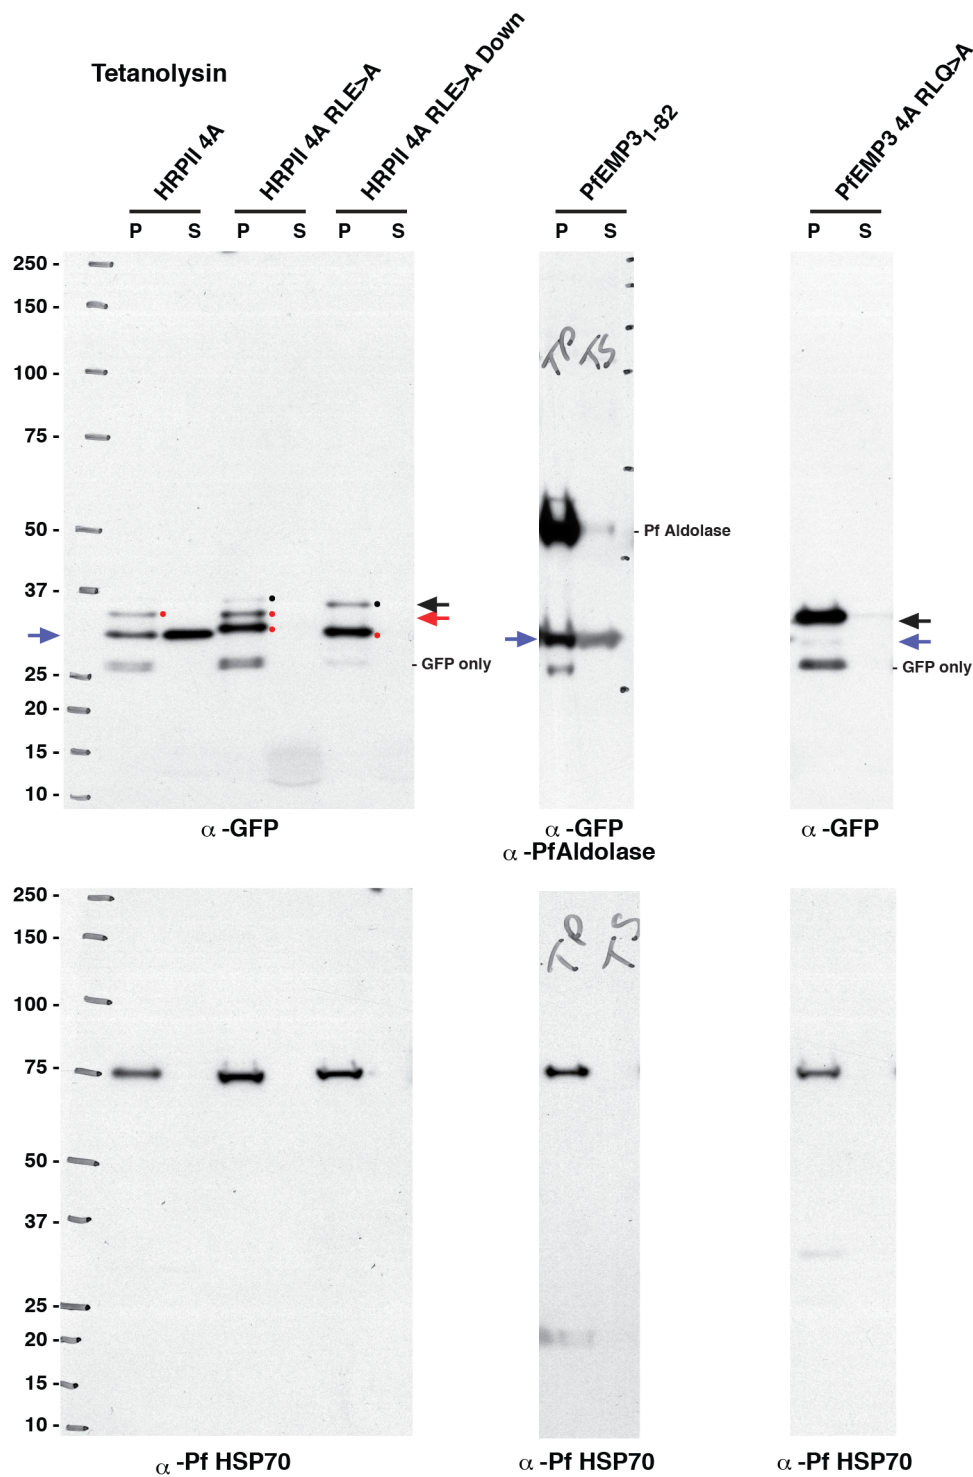

**Supplementary Figure 9. Immunoblot with anti-GFP antibodies of chimeras from the tetanolysin pellet (P) and supernatant (S) shows that HRPII 4A and PfEMP3<sub>1-82</sub> are cleaved at the PEXEL (blue arrow) and exported. Full-length blots from Fig. 4d. Signal peptide-cleaved HRPII 4A was also visible (red spot). HRPII 4A RLE>A, HRPII 4A RLE>A Down, and PfEMP3<sub>1-82</sub> RLQ>A were not exported and bands corresponding to signal peptide-cleaved (various positions possibly due to insertion of four alanines; red spots/arrow) and uncleaved protein (black spots/arrow) are present.**

**c**

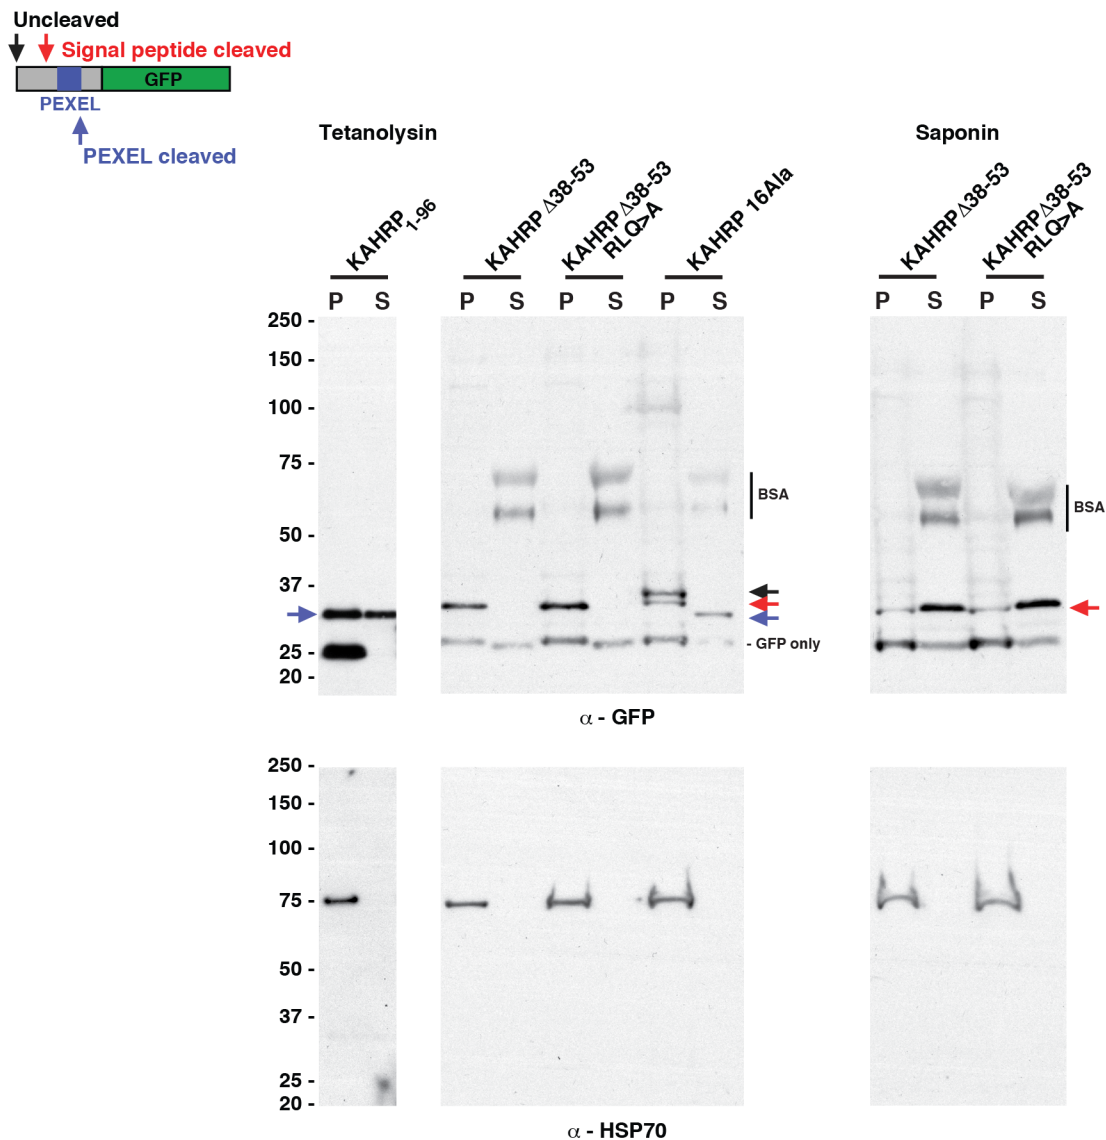

**Supplementary Figure 10. Immunoblot with anti-GFP antibodies of chimeras from the tetanolysin and saponin pellet (P) and supernatant (S).** Full-length blots from Fig. 5c. This shows KAHRP<sub>1-96</sub> at a size corresponding to cleavage at the PEXEL and it was exported (32 kDa; blue arrows), KAHRP $\Delta$ 38-53 and KAHRP $\Delta$ 38-53 RLQ>E were cleaved to a size corresponding to cleavage by signal peptidase (32.5 kDa; red spots) and were not exported, but were present in the saponin supernatant confirming they were secreted to the PV, and that KAHRP16Ala was of a size corresponding to cleavage at the PEXEL and it was exported (32 kDa; blue arrow) but cleavage was inefficient as bands consistent with signal sequence cleaved (red arrow) and uncleaved (black) species were present in the pellet fraction. HSP70 was used as a control.

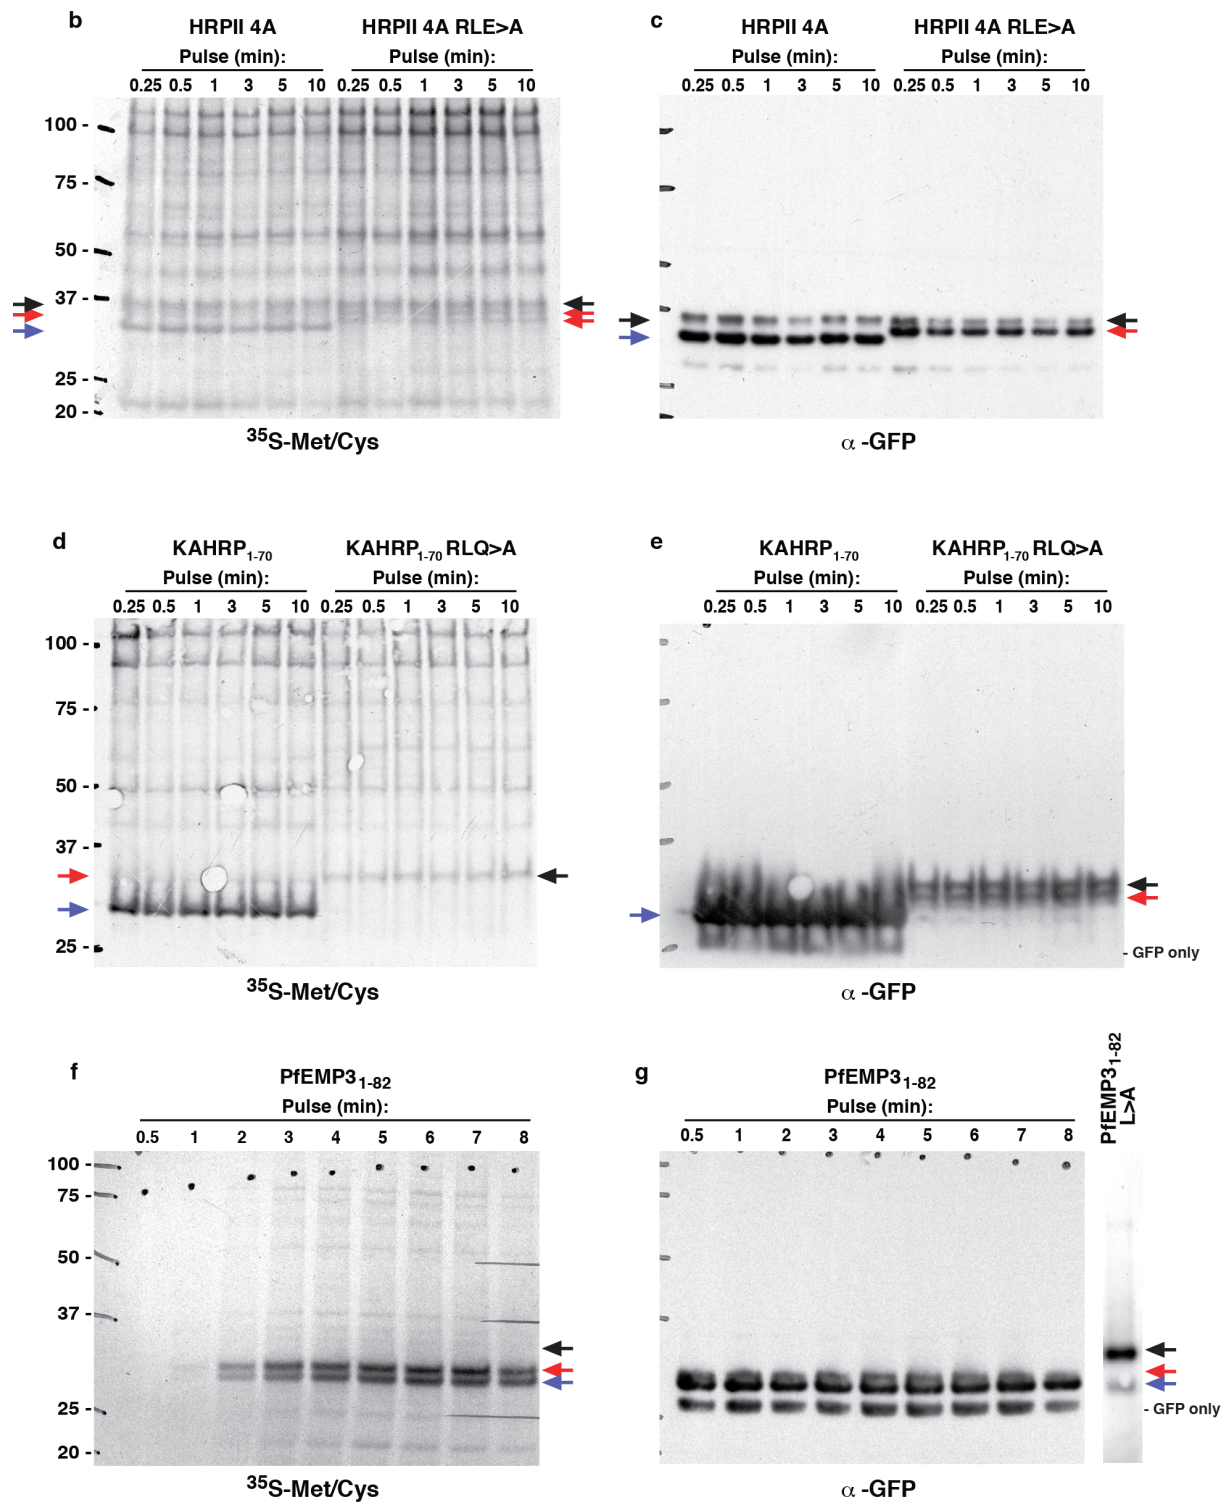

**Supplementary Figure 11. The PEXEL is cleaved co-translationally.** Full-length blots for Fig. 6b-g. **(b)**  $^{35}\text{S}$ -Methionine/Cysteine-labelling ( $^{35}\text{S-Met/Cys}$ ) of HRPII 4A and HRPII 4A RLE>A in *P. falciparum* for the indicated times shows bands corresponding to uncleaved (black arrow), signal peptide-cleaved (red arrow) and PEXEL-cleaved (blue arrow) species. Two signal peptide-cleaved species are present for RLE>A (red arrows), possibly due to insertion of four alanines following the signal sequence. **(c)** Immunoblot with anti-GFP

antibodies of the same membrane shows the bands are GFP-specific. The uncleaved HRPII 4A protein likely represents small quantities not detected by immunoblot as this reveals protein produced over hours. **(d)**  $^{35}\text{S}$ -Met/Cys-labelling of KAHRP<sub>1-70</sub> and KAHRP<sub>1-70</sub>-RLQ>A in *P. falciparum*. Bands corresponding to uncleaved (black arrow), signal peptide-cleaved (red arrow) and PEXEL-cleaved (blue arrow) species are indicated. **(e)** Immunoblot with anti-GFP antibodies of the same membrane. Note the absence of a signal peptidase cleaved product for KAHRP<sub>1-70</sub> RLQ>A in the autoradiography. **(f)** Left:  $^{35}\text{S}$ -Met/Cys-labelling of PfEMP3<sub>1-82</sub> in *P. falciparum*. Bands corresponding to cleavage of the indented signal peptide (red arrow) and PEXEL (blue arrow) are indicated. **(g)** Immunoblot with anti-GFP antibodies of the same membrane. A PEXEL mutant (PfEMP3<sub>1-82</sub> L>A) was included as a size control. Most protein detected with anti-GFP was present prior to radiolabelling so quantity is not comparable to  $^{35}\text{S}$ -Met/Cys. Incorporation of  $^{35}\text{S}$ -Met/Cys into HRPII and KAHRP constructs did not increase appreciably over time, in contrast to PfEMP3. This reason for this is unknown but may be due to saturation of anti-GFP agarose in the former experiments, which was used to enrich the GFP proteins.

## Supplementary Tables

Supplementary Table 1: Summary of constructs tested in previous studies and this study

| Previous construct                | Previous result               | Our construct                      | Our result               | Same amino acid sequences ?                                     |
|-----------------------------------|-------------------------------|------------------------------------|--------------------------|-----------------------------------------------------------------|
| Avr3aGFP*                         | Exported                      | HRPII <sub>ss</sub> -AVR3a         | Not exported             | Yes                                                             |
| PH001D5GFP*                       | Exported                      | HRPII <sub>ss</sub> -PH001D5       | Not exported             | Yes                                                             |
| p40-phox-PX                       | Binds PI(3)P                  | P40PX                              | Binds PI(3)P             | Yes                                                             |
| HRPII HT                          | Binds PI(3)P                  | HRPII WT                           | Low/no PI(3)P binding    | Ours used 3D7 RLLHE PEXEL, previous used FCB RLLYE <sup>#</sup> |
| HRPII ALAYA                       | Low/no PI(3)P binding         | HRPII RLE>A                        | Low/no PI(3)P binding    | Ours used 3D7 ALAHA PEXEL, previous used FCB ALAYA <sup>#</sup> |
| PfEMP1 (PFL1960w) KELLD- GFP      | Binds PI(3)P                  | PfEMP1 WT                          | Low/no PI(3)P binding    | Yes                                                             |
| PfEMP1 (PFL1960w) AELLD-GFP       | Low/no PI(3)P binding         | PfEMP1 K>A                         | Low/no PI(3)P binding    | Yes                                                             |
| SS-Nuk10WT-GFP                    | Exported                      | HRPII <sub>ss</sub> -PH001D5       | Not exported             | Similar but Nuk10 has 4Ala just after signal sequence           |
| SS-AAAA-HT-GFP                    | Exported                      | HRPII 4A                           | Exported                 | Ours used 3D7 RLLHE PEXEL, previous used RLLYE <sup>#</sup>     |
| SS-AAAA-ALAYA-GFP                 | Exported                      | HRPII 4A RLE>A                     | Not exported             | Ours used 3D7 ALAHA PEXEL, previous used ALAYA <sup>#</sup>     |
| SS-AAAA-ALAYA-down-GFP            | Not exported                  | HRPII 4A RLE>A Down                | Not exported             | Ours used 3D7 ALAHA PEXEL, previous used ALAYA <sup>#</sup>     |
| PfEMP3-RSLAQ-GFP                  | Exported                      | PfEMP3 <sub>1-82</sub>             | Exported                 | Yes                                                             |
| PfEMP3-A4-ASAAA-GFP               | Exported                      | PfEMP3 4A RLQ>A                    | Not exported             | Yes                                                             |
| SS-p40phox <sup>WT</sup> -mCherry | Retained in ER reportedly via | STEVR <sub>ss</sub> -p40PX-GFP and | Both secreted to PV, not | Same p40 domain sequence, different signal                      |

|                                     |                              |                                  |                           |                                                                         |
|-------------------------------------|------------------------------|----------------------------------|---------------------------|-------------------------------------------------------------------------|
|                                     | PI(3)P binding               | ACPss-p40PX - GFP                | retained in ER            | sequence and fluorescent tag                                            |
| SS-p40phox <sup>R58Q</sup> -mCherry | Secreted to PV, no longer ER | ACPss-p40PX <sub>R58Q</sub> -GFP | Secreted to PV, not in ER | Same p40 domain sequence, different signal sequence and fluorescent tag |

\*These constructs are from Bhattacharjee *et al* PloS Pathogens 2006 and the remainder are from Bhattacharjee *et al* Cell 2012.

#The unusual PEXEL sequence RLLYE was used in Bhattacharjee *et al* Cell 2012 instead of the 3D7 PEXEL sequence RLLHE from *P. falciparum* 3D7 HRP II.

All studies used *P. falciparum* strain 3D7 for transfection and export analyses.

Supplementary Table 2: Oligonucleotide sequences used for making transfection constructs

| Name                                    | Oligonucleotide sequence (underlined bases are restriction sites for cloning)                                                                                                                                   |
|-----------------------------------------|-----------------------------------------------------------------------------------------------------------------------------------------------------------------------------------------------------------------|
| JB170                                   | GAGCATATGTACATCTGCGGTGAC                                                                                                                                                                                        |
| JB171                                   | ATACCGCGGCAGGTCTTCTTCAGAGATCAGTTTCTGTTCA<br>GATTCACGGAACCGT AGTCA                                                                                                                                               |
| JB172                                   | GAGCATATGCGTATCCTGGCTGAAGGTGA                                                                                                                                                                                   |
| JB173                                   | TGAACCCCTCCGCGGCAGGT                                                                                                                                                                                            |
| JB174                                   | ATACCGCGGCAGGTCTTCTTCAGAGATCAGTTTCTGTTCT<br>TCAGCCAGGATACGAGATT                                                                                                                                                 |
| JB175                                   | GAGCATATGGGTGAAGACACCTGCGCTCG                                                                                                                                                                                   |
| JB176                                   | AGACCGCGGAGTAAAGGAGAAGAAGCTTTTCA                                                                                                                                                                                |
| JB177                                   | AGAGGATCCATGATGATGATGGTGGTGAATGTTTGT<br>TAGTTCATCCATGCCA                                                                                                                                                        |
| P40_A_F                                 | GGCCTAGGATGGCTGTGGCCAGCAG                                                                                                                                                                                       |
| p40_K_R                                 | CCGGTACCGCGGAGTGCCTGGGGCAC                                                                                                                                                                                      |
| GFP_K_F                                 | GTACCGTACCATGAGTAAAGGAGAAGAAG                                                                                                                                                                                   |
| GFP_SDEL_X_R                            | GGCCCGGGTTAAAGTTCATCACTTTTGTATAGTTCATCCA<br>TGCCA                                                                                                                                                               |
| 5'ACPsp-PX40p                           | TATATATAATGAAGATCTTATTACTTTGTATAATTTTCT<br>ATATTATGTAAACGCTTTTAAAAATACAATGGCTGTGGCC<br>CAGCAGCTG                                                                                                                |
| 3'KpnI-PX40-rev                         | CCCGGTACCTGAGTCATAGGGCGACTGG                                                                                                                                                                                    |
| HRS_FYVE_AvrII_F                        | GGCCTAGGATGGAAAGTGATGCCATGTTG                                                                                                                                                                                   |
| HRS_FYVE_KpnI_R                         | CCGGTACCTGCCTTCTTGTTTCAGCTGCTC                                                                                                                                                                                  |
| Rex3(1-43)-<br>Avr1b(22-71)KpnI-<br>rev | CAGTCCTAGGATCTGTTACTGAAAATGTTCTTTTACCAGC<br>ATCATCTTCTTCATGAGCTCTTAAAAATCTACCACCAGCT<br>ATATCACCATTCTTAAATGATCTTCTTACTAAATCTGGTG<br>ATTCTACCATAGCTATATTTGTTTCATCTGAATATTCTGT<br>GCTCCCTTCGTATGAGGTGGTATATTTATAG |
| Rex3Avh5(20-63)-<br>avrII-rev           | CAGTCCTAGGTTTACCTGGATTATGTACTTTTGGTTCATA<br>TACTATATCTGTATCAGCTGTTCTTAAAAATCTTCTTGAT<br>CTTGTTACTGTTTGTACTGGAGCATTTACTGATTGTAAAT<br>TAGCATCATCTGGTACTCTTGTGCTCCCTTCGTATGAGGT<br>GGTATATTTATAG                   |

### Supplementary References

1. Bhattacharjee S, Stahelin RV, Speicher KD, Speicher DW, Haldar K. Endoplasmic reticulum PI(3)P lipid binding targets malaria proteins to the host cell. *Cell* **148**, 201-212 (2012).
2. Boddey JA, *et al.* An aspartyl protease directs malaria effector proteins to the host cell. *Nature* **463**, 627-631 (2010).
